# Supplementary material for: Ultrahigh-performance transparent conductive films of carbon-welded isolated single-wall carbon nanotubes
Source: PubMed Central journal article supplement — Sci Adv. 2018 May 4;4(5):eaap9264. doi: 10.1126/sciadv.aap9264 (PMC5935479; doi:10.1126/sciadv.aap9264), 2018-05-04
Supplement: aap9264_SM.pdf [file aap9264_SM.pdf]

## Supplementary Materials for **Ultrahigh-performance transparent conductive films of carbon-welded isolated single-wall carbon nanotubes**

Song Jiang, Peng-Xiang Hou, Mao-Lin Chen, Bing-Wei Wang, Dong-Ming Sun, Dai-Ming Tang, Qun Jin, Qing-Xun Guo, Ding-Dong Zhang, Jin-Hong Du, Kai-Ping Tai, Jun Tan, Esko I. Kauppinen, Chang Liu, Hui-Ming Cheng

Published 4 May 2018, *Sci. Adv.* **4**, eaap9264 (2018)

DOI: 10.1126/sciadv.aap9264

### The PDF file includes:

- fig. S1. Experimental setup for SWCNT synthesis.
- fig. S2. Typical TEM images of different SWCNTs.
- fig. S3. Microstructures of isolated SWCNTs with carbon-welded joints.
- fig. S4. Thermal and optical characterizations.
- fig. S5. Experimental setup for preparing large-area SWCNT films and their characterizations.
- fig. S6. Optical, electrical, and mechanical characterizations of SWCNT films.
- fig. S7. SWCNT OLEDs.
- fig. S8. SWCNT FETs.
- table S1. Summary of the performance of pristine or doped SWCNT TCFs.
- table S2. Chemical stability of a pristine SWCNT TCF evaluated by an accelerated aging test.
- Reference (45)

### Other Supplementary Material for this manuscript includes the following:

(available at [advances.sciencemag.org/cgi/content/full/4/5/eaap9264/DC1](https://advances.sciencemag.org/cgi/content/full/4/5/eaap9264/DC1))

- movie S1 (.mp4 format). Bending test of SWCNT OLED.

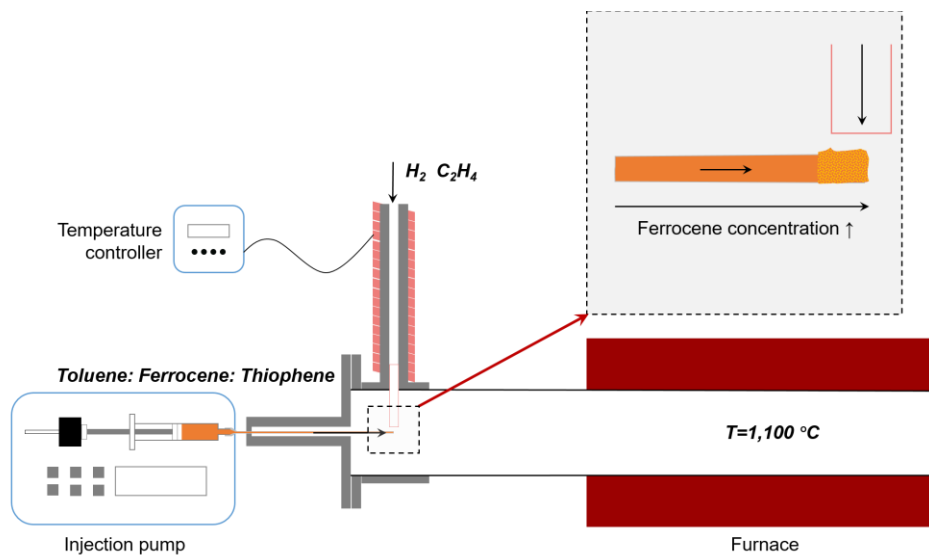

**fig. S1. Experimental setup for SWCNT synthesis.** The injection-FCCVD method with heated high-flux gases ensures the synthesis of high-quality SWCNT films.

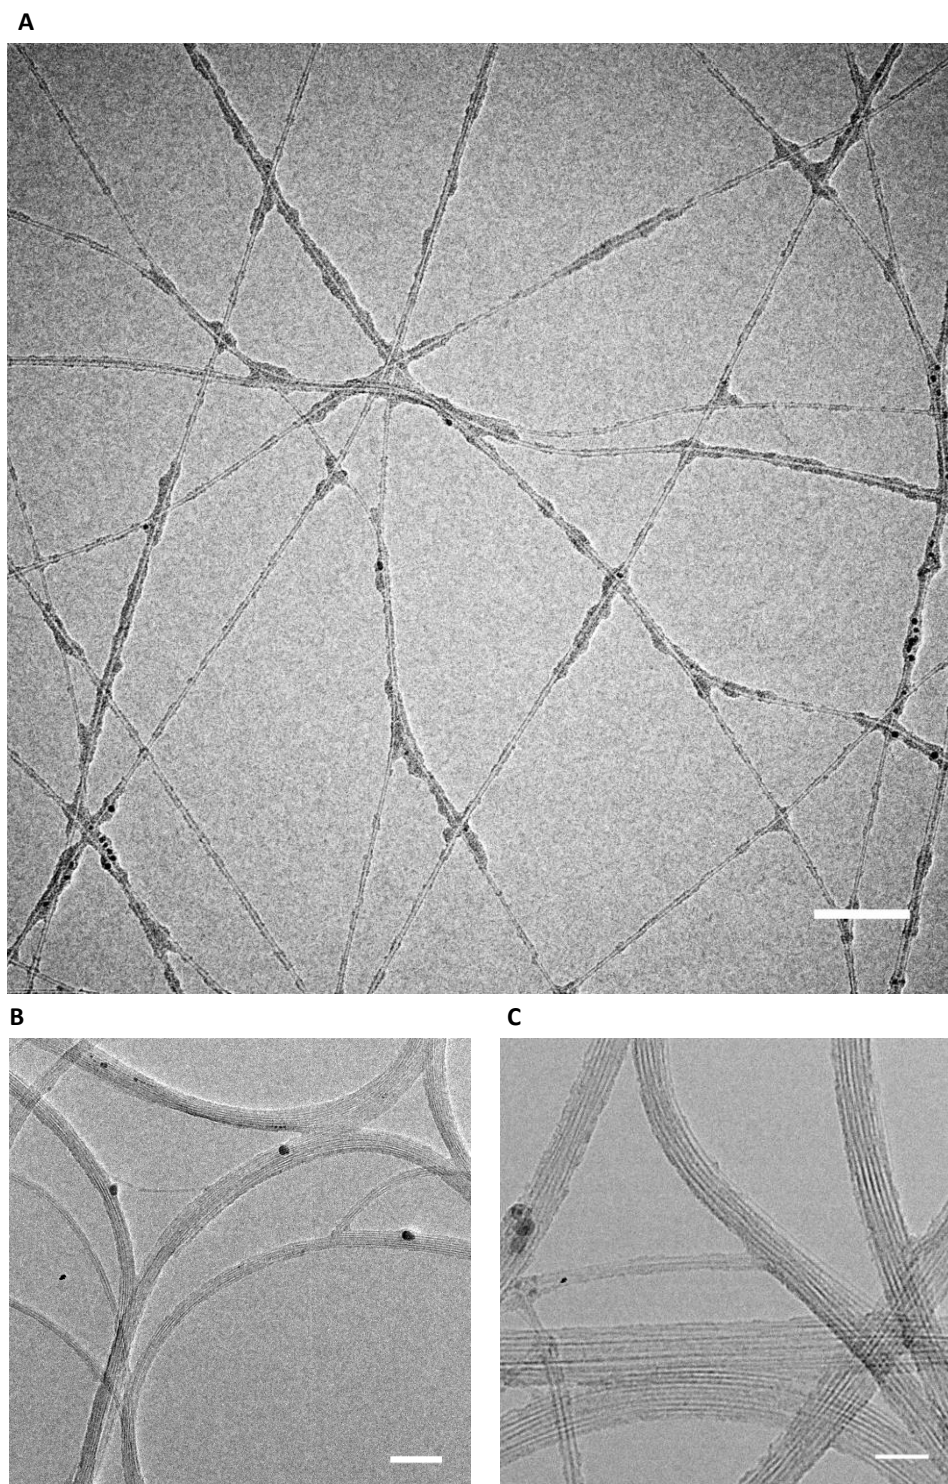

**fig. S2. Typical TEM images of different SWCNTs.** (A) Typical TEM image of isolated SWCNTs with carbon-welded joints. The scale bar is 50 nm. (B and C) Typical TEM images of normal bundled SWCNTs. The respective scale bars in (B) and (C) are 50 nm and 20 nm. Entangled SWCNT bundles with diameters of  $\sim 20$  nm are observed.

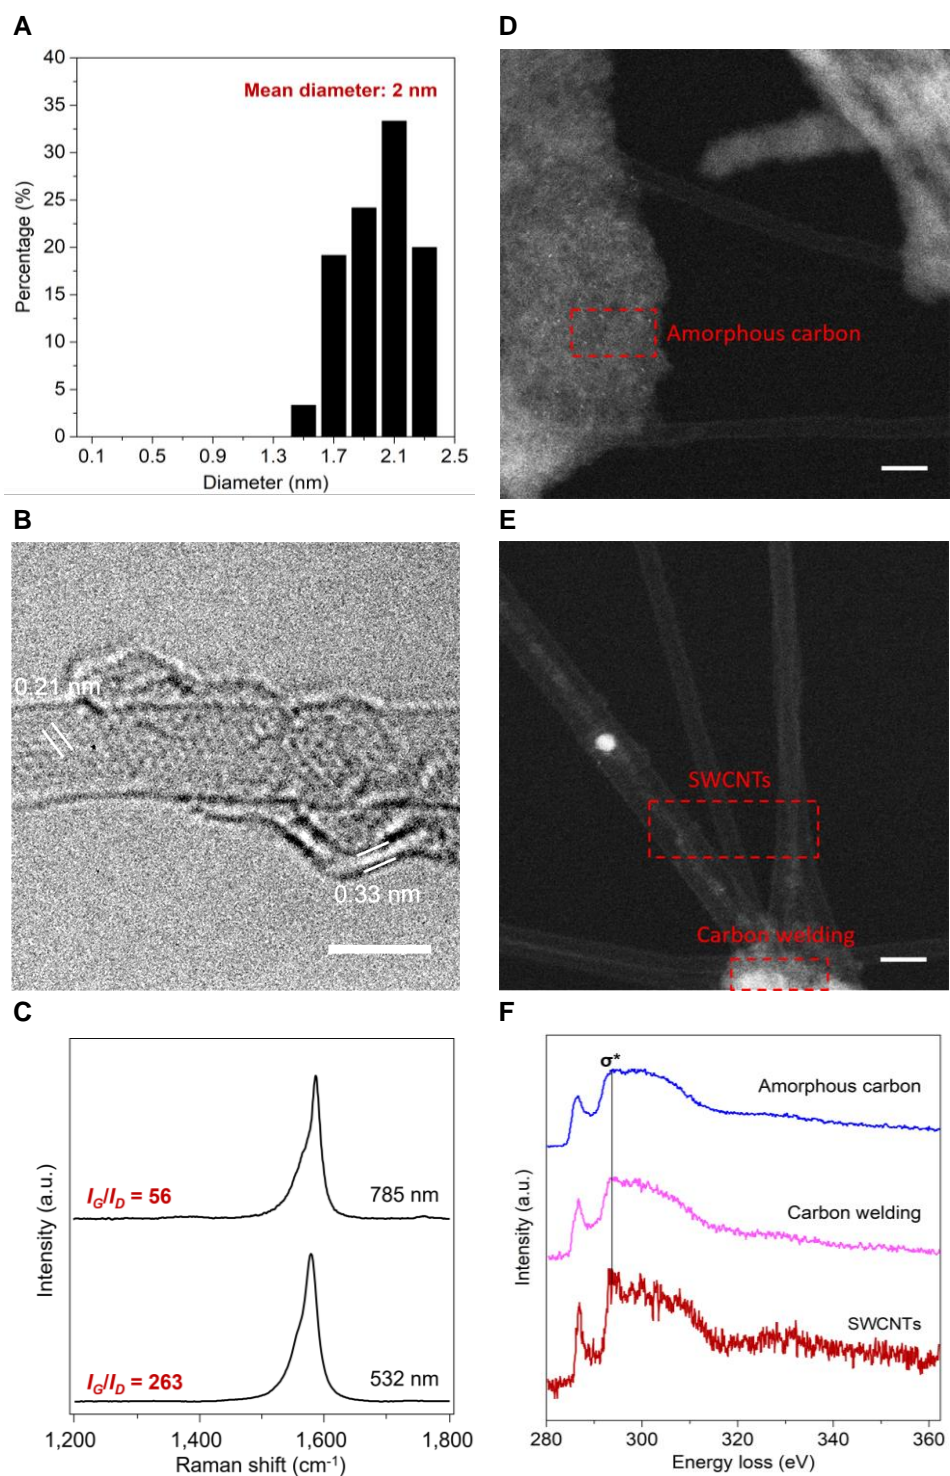

**fig. S3. Microstructures of isolated SWCNTs with carbon-welded joints. (A)** Diameter distribution of SWCNTs measured from TEM observations. **(B)** Typical high-resolution image of the surplus carbon. The scale bar is 2 nm. **(C)** Raman spectra excited by 532 and 785 nm lasers. **(D)** A STEM (Dark field) image of amorphous carbon on Cu grid. The scale bar is 5 nm. **(E)** A STEM (Dark field) image of SWCNTs

and carbon welding. The scale bar is 5 nm. (F) EELS spectra at C *K*-edge of the amorphous carbon, carbon welding and SWCNTs as marked with red rectangles in (C) and (D).

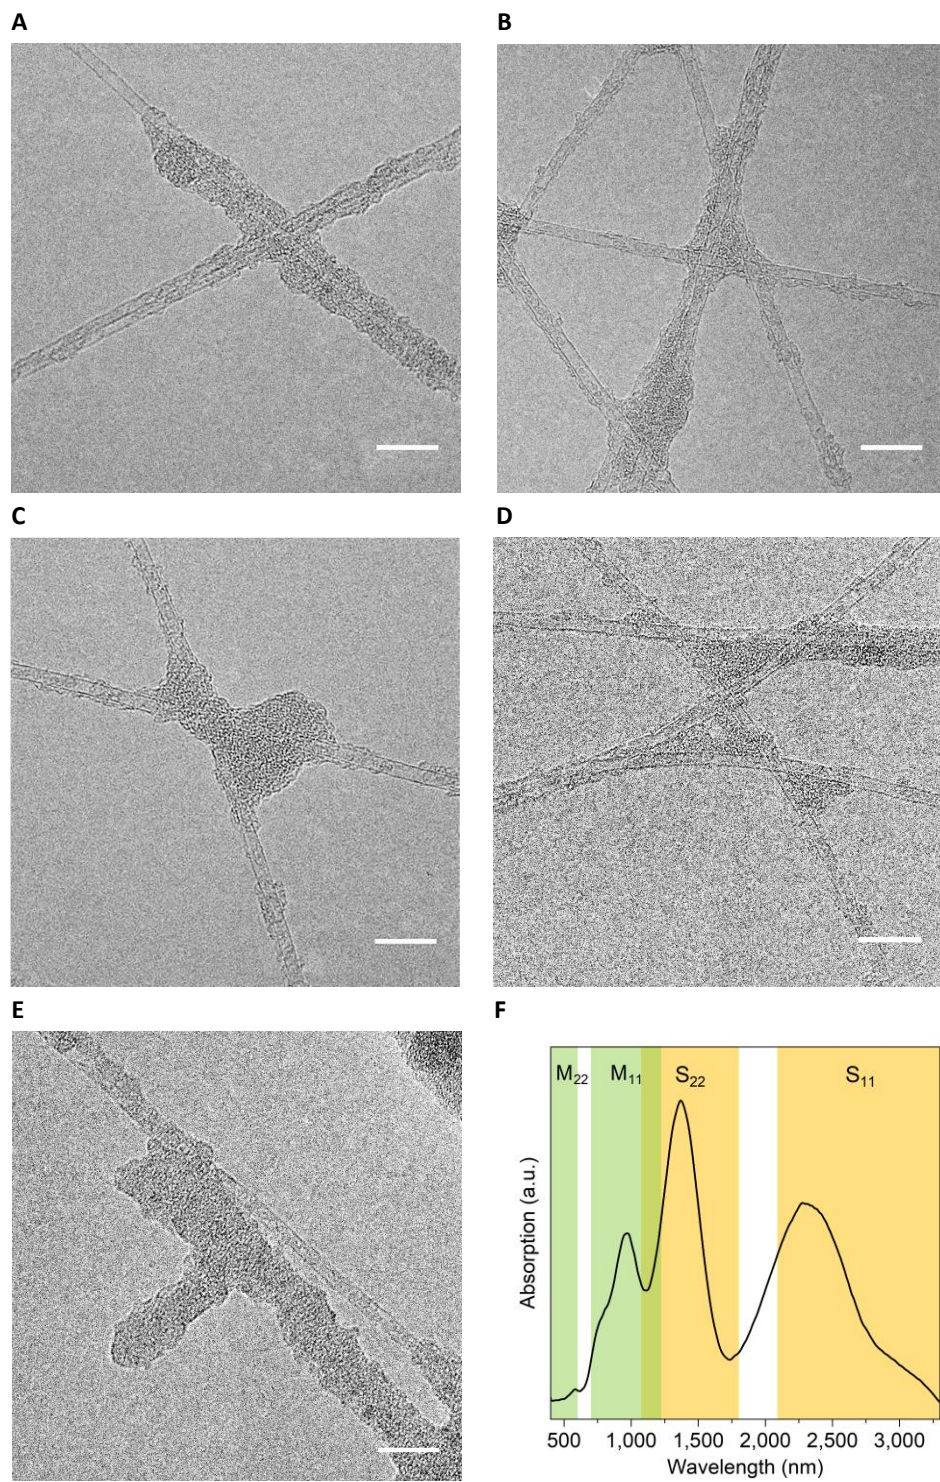

**fig. S4. Thermal and optical characterizations.** (A-E) Typical TEM images of the carbon-welded SWCNTs after heat treatment. (A) 400 °C, (B) 500 °C, (C) 600 °C, (D) 700 °C, (E) 750 °C. All the scale bars are 10 nm. In (A) to (D), no obvious change can be observed, demonstrating the high quality of the SWCNTs

and good stability of the carbon welding. (E) shows that most of SWCNTs have been destroyed, while the carbon welding material remains. (F) Absorption spectrum of the carbon-welded SWCNT film.

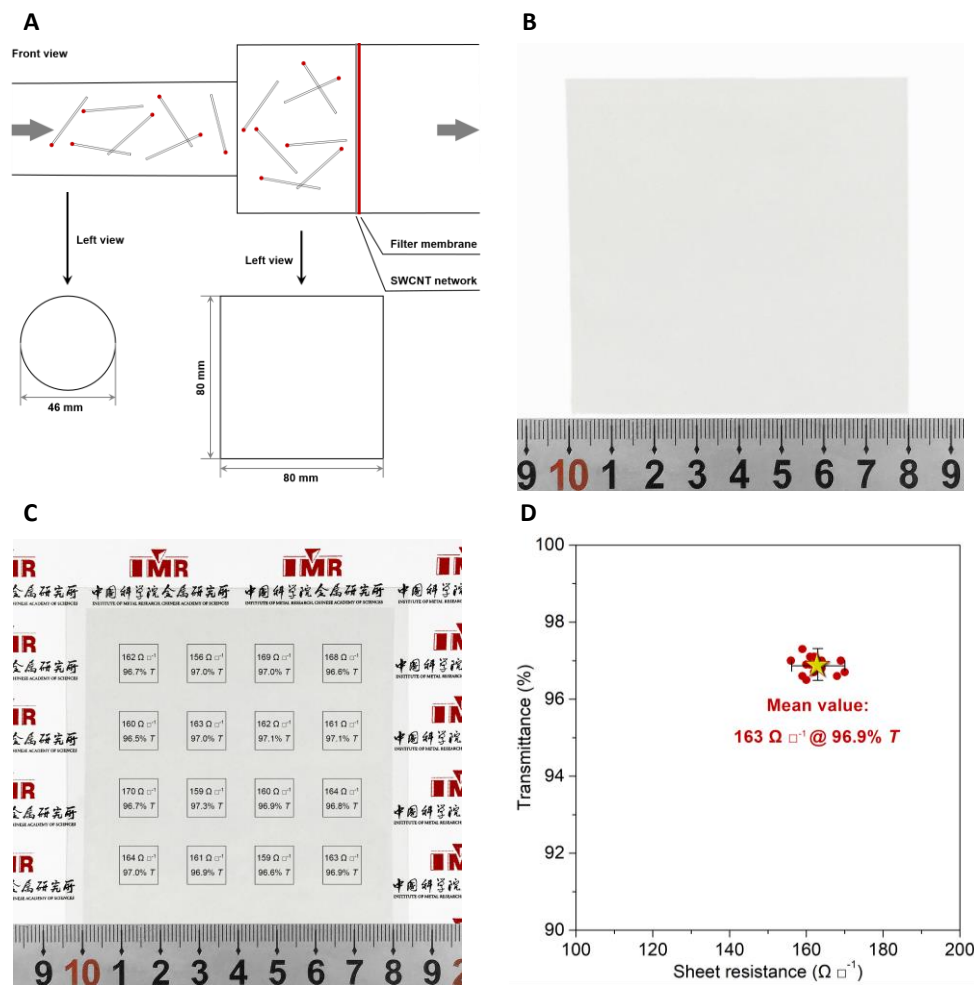

**fig. S5. Experimental setup for preparing large-area SWCNT films and their characterizations. (A)** Schematic of the collection process of large-area 80 mm × 80 mm SWCNT films. **(B)** Optical image of a collected SWCNT film deposited on a porous filter membrane. **(C)** Optical image of a transferred SWCNT TCF on a PET substrate with local  $R_s$  and  $T$  values labeled. **(D)** The statistics of  $T$  versus  $R_s$  at the 16 different locations in (C).



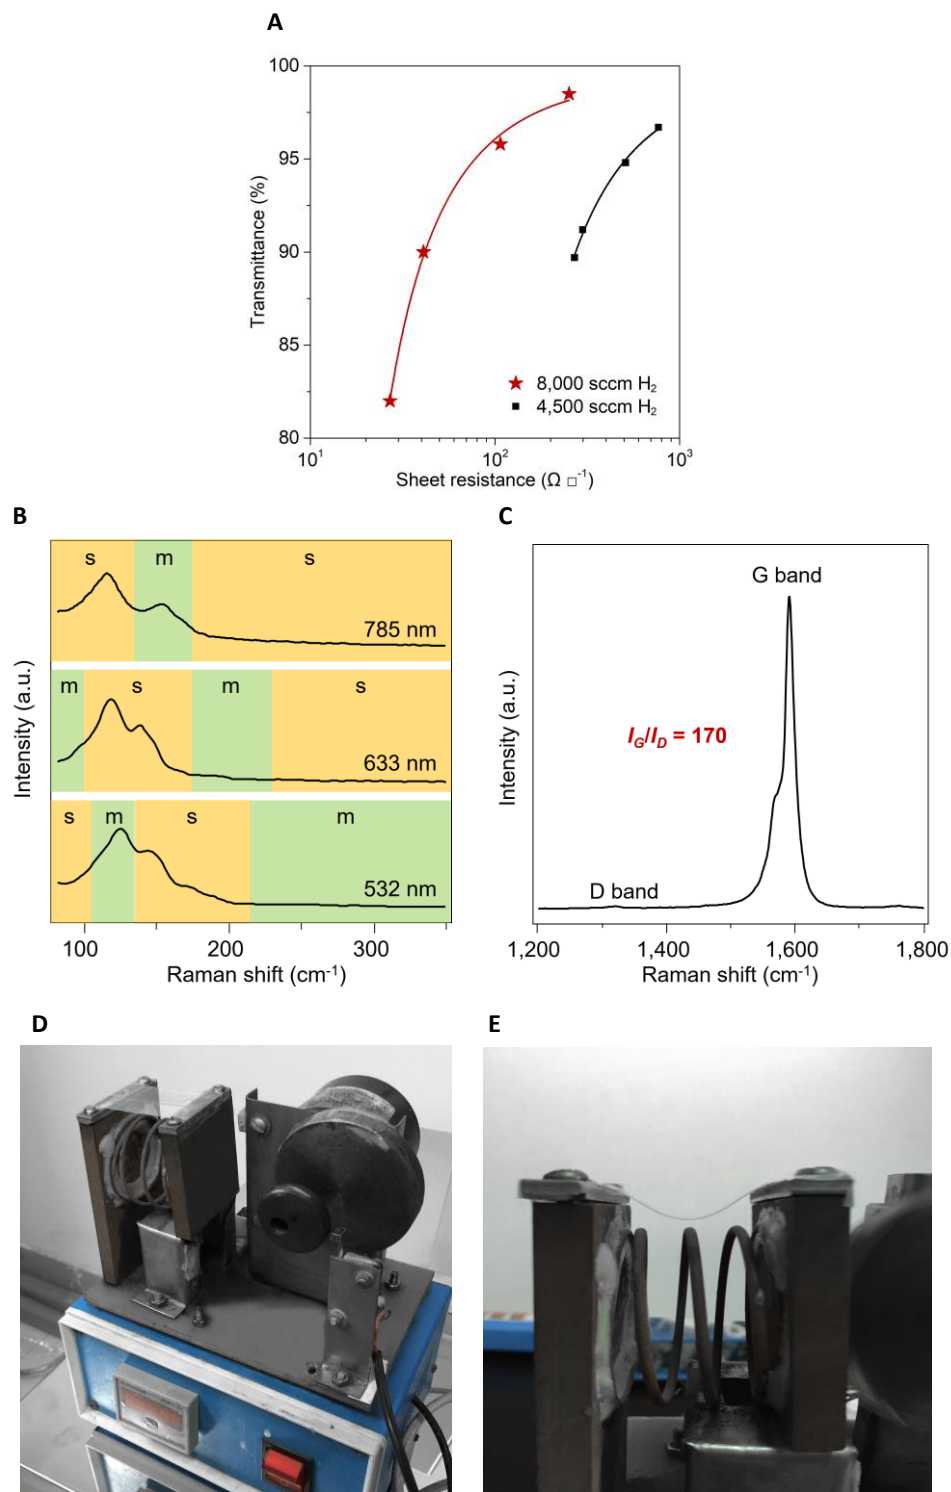

**fig. S6. Optical, electrical, and mechanical characterizations of SWCNT films. (A)**  $T$  (for 550 nm light) versus  $R_s$  of SWCNT TCFs synthesized using different-flux H<sub>2</sub>. The typical performances of the SWCNT TCFs synthesized using 8,000 sccm and 4,500 sccm H<sub>2</sub> are 41 Ω □<sup>-1</sup> and 270 Ω □<sup>-1</sup> at 90%  $T$  for 550 nm light, respectively. **(B)** RBM mode Raman spectra of the normal bundled SWCNTs excited by 532, 633 and 785 nm lasers. **(C)** G and D bands of the Raman spectra of the normal bundled SWCNTs excited by

a 633 nm laser. (D) Oblique view of the bending test setup. (E) Front view of the bending test setup.

The TCFs were bent with an angle of  $70^\circ$  and a minimum radius of curvature of 5 mm.

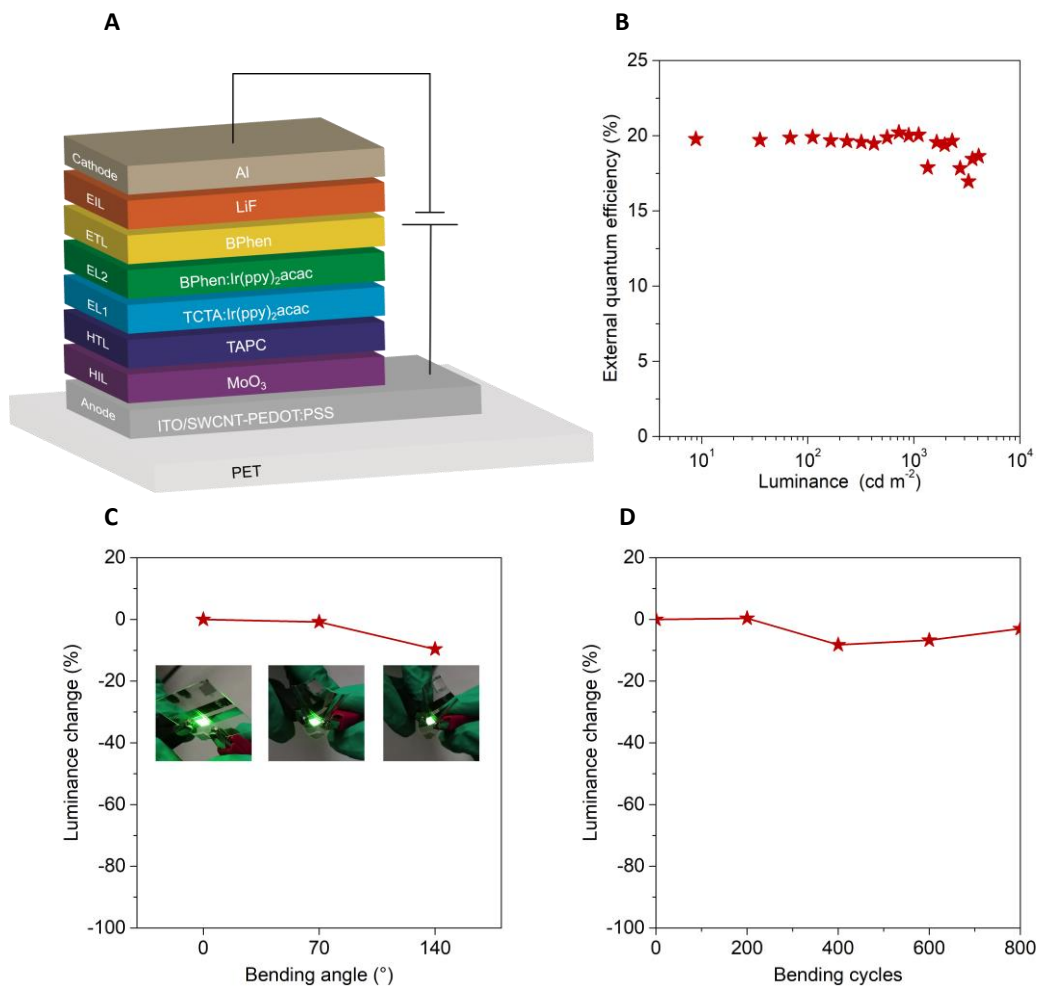

**fig. S7. SWCNT OLEDs.** (A) Schematic showing the structure of a SWCNT OLED. (B) External quantum efficiency *versus* luminance of the device. (C) Dependence of luminance change on bending angle of the flexible OLED with a minimum curvature radius of  $\sim 2$  mm. (D) Dependence of luminance change of the OLED on bending cycles with a bending angle of  $70^\circ$  and a minimum curvature radius of  $\sim 4$  mm.

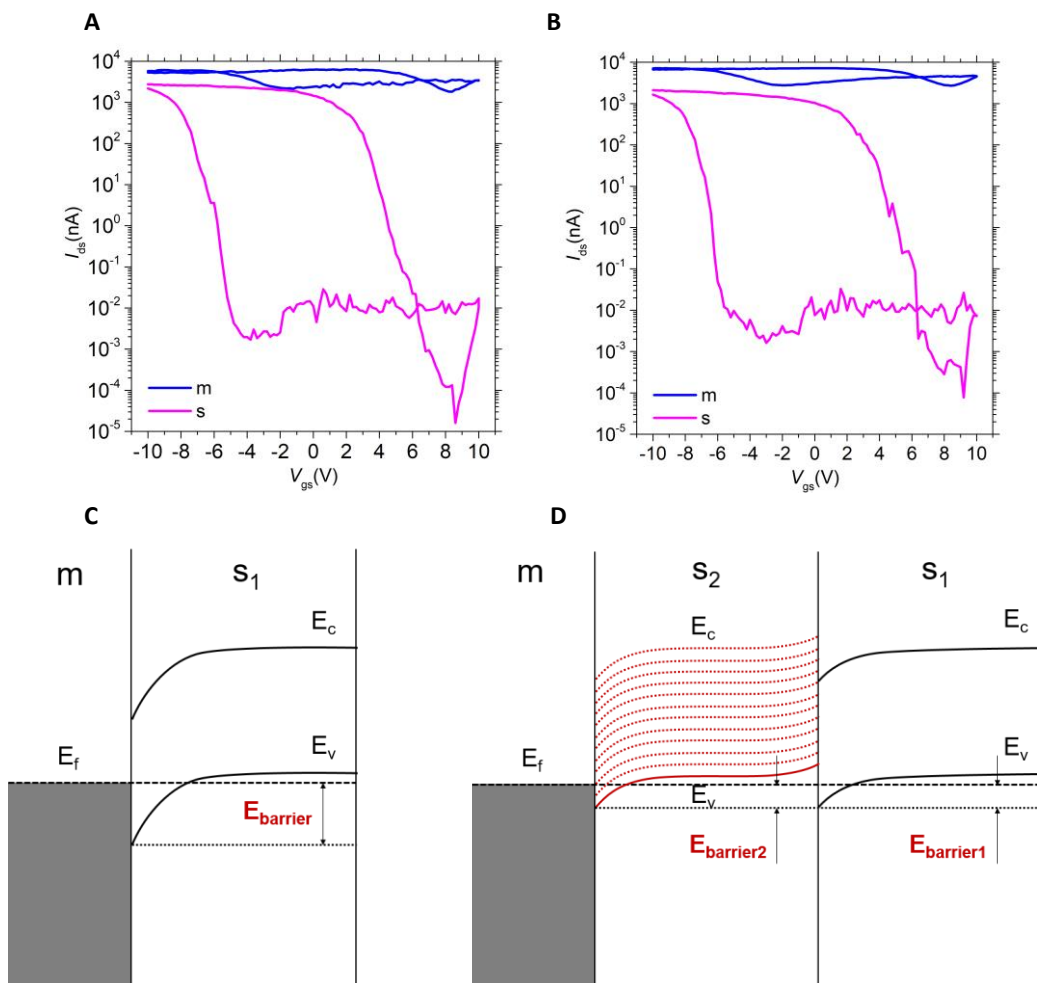

**fig. S8. SWCNT FETs.** (A and B) (A) and (B) show transfer characteristics  $I_{ds}$  versus  $V_{gs}$  curves of the SWCNTs shown in Fig. 5, A and C, respectively.  $V_{ds} = -1$  V. The large hysteresis is mainly caused by charge traps originated from the adsorption of water molecules from ambient environment (45). (C) Schematic of the energy band at m-SWCNT (m)/s-SWCNT ( $s_1$ ). (D) Schematic of the energy band at m-SWCNT (m)/carbon welding ( $s_2$ )/s-SWCNT ( $s_1$ ). The red dotted lines indicate the bottoms of possible conduction bands of the carbon welding material formed from graphitic nanosheets with various sizes and edge structures.

**table S1. Summary of the performance of pristine or doped SWCNT TCFs. (A) Summary of the performance of pristine SWCNT TCFs.**

| <b>Fabrication method</b> | <b>Substrate</b> | <b><math>R_s</math><br/>(<math>\Omega \square^{-1}</math>)</b> | <b><math>T</math><br/>(550 nm light)</b> | <b>Year</b> | <b>Reference</b> |
|---------------------------|------------------|----------------------------------------------------------------|------------------------------------------|-------------|------------------|
| Dry process               | Quartz           | 950                                                            | 90%                                      | 2016        | (4)              |
| Dry process               | PET              | ~650                                                           | 90%                                      | 2014        | (14)             |
| Dry process               | Quartz           | ~635                                                           | 95%                                      | 2015        | (15)             |
|                           |                  | 310                                                            | 90%                                      |             |                  |
| Dry process               | Quartz           | ~410                                                           | 95%                                      | 2014        | (18)             |
|                           |                  | 224                                                            | 90%                                      |             |                  |
| Dry process               | Glass            | 50                                                             | 70%                                      | 2007        | (29)             |
| Solution process          | -                | ~231                                                           | 75%                                      | 2008        | (30)             |
| Dry process               | PET              | 252                                                            | 98.5%                                    | This work   |                  |
|                           |                  | 107                                                            | 95.8%                                    |             |                  |
|                           |                  | 41                                                             | 90%                                      |             |                  |
|                           |                  | 27                                                             | 82%                                      |             |                  |

**(B) Summary of the performance of doped SWCNT TCFs.**

| <b>Fabrication method</b> | <b>Substrate</b> | <b>Dopant</b>     | <b><math>R_s</math><br/>(<math>\Omega \square^{-1}</math>)</b> | <b><math>T</math><br/>(550 nm light)</b> | <b>Year</b> | <b>Reference</b> |
|---------------------------|------------------|-------------------|----------------------------------------------------------------|------------------------------------------|-------------|------------------|
| Solution process          | PET              | CSA               | 60                                                             | 90.9%                                    | 2011        | (2)              |
| Dry process               | Quartz           | HNO <sub>3</sub>  | 63                                                             | 90%                                      | 2015        | (3)              |
| Dry process               | Quartz           | HNO <sub>3</sub>  | 89                                                             | 90%                                      | 2016        | (4)              |
| Dry process + Patterning  |                  |                   | 29                                                             | 87%                                      |             |                  |
| Solution process          | Quartz           | HNO <sub>3</sub>  | 30                                                             | 70%                                      | 2004        | (12)             |
| Dry process               | PET              | HNO <sub>3</sub>  | 160                                                            | 90%                                      | 2014        | (14)             |
| Dry process               | Quartz           | AuCl <sub>3</sub> | 95                                                             | 90%                                      | 2017        | (33)             |
|                           |                  |                   | 140                                                            | 98.5%                                    |             |                  |
|                           |                  |                   | 49                                                             | 95.8%                                    |             |                  |
| Dry process               | PET              | HNO <sub>3</sub>  | 25                                                             | 90%                                      |             | This work        |
|                           |                  |                   | 15                                                             | 82%                                      |             |                  |

**table S2. Chemical stability of a pristine SWCNT TCF evaluated by an accelerated aging test.**

| <b>Sample</b>      | <b>Before the accelerated aging test</b> |                                                                | <b>After the accelerated aging test</b> |                                                                |
|--------------------|------------------------------------------|----------------------------------------------------------------|-----------------------------------------|----------------------------------------------------------------|
|                    | <b><i>T</i> (%)</b>                      | <b><i>R<sub>s</sub></i> (<math>\Omega \square^{-1}</math>)</b> | <b><i>T</i> (%)</b>                     | <b><i>R<sub>s</sub></i> (<math>\Omega \square^{-1}</math>)</b> |
| Pristine SWCNT TCF | 90.0                                     | 41                                                             | 89.8                                    | 38                                                             |

Conditions of the accelerated aging test: 60 °C & 90% relative humidity for 250 h.
